# Supplementary material for: SIOP Ependymoma I: Final results, long-term follow-up, and molecular analysis of the trial cohort—A BIOMECA Consortium Study
Source: PubMed Central journal article supplement — Neuro Oncol. 2022 Jan 9;24(6):936–48. doi: 10.1093/neuonc/noac012 (PMC9159435; doi:10.1093/neuonc/noac012), 2022-01-09
Supplement: noac012_suppl_supplementary_material_s4.pdf [file noac012_suppl_supplementary_material_s4.pdf]

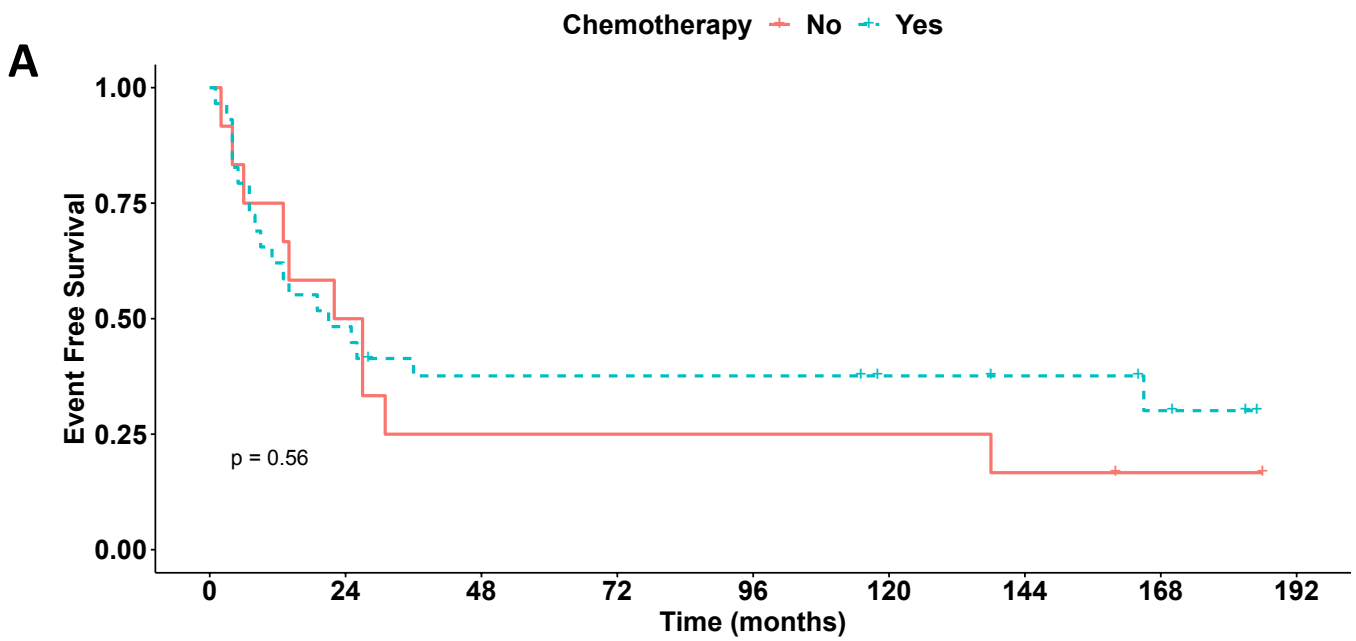

Chemotherapy

|     | Number at risk: n (%) |         |         |         |         |        |        |        |       |
|-----|-----------------------|---------|---------|---------|---------|--------|--------|--------|-------|
|     | 0                     | 24      | 48      | 72      | 96      | 120    | 144    | 168    | 192   |
| No  | 12 (100)              | 6 (50)  | 3 (25)  | 3 (25)  | 3 (25)  | 3 (25) | 2 (17) | 1 (8)  | 0 (0) |
| Yes | 29 (100)              | 14 (48) | 10 (34) | 10 (34) | 10 (34) | 8 (28) | 6 (21) | 4 (14) | 0 (0) |

Time (months)

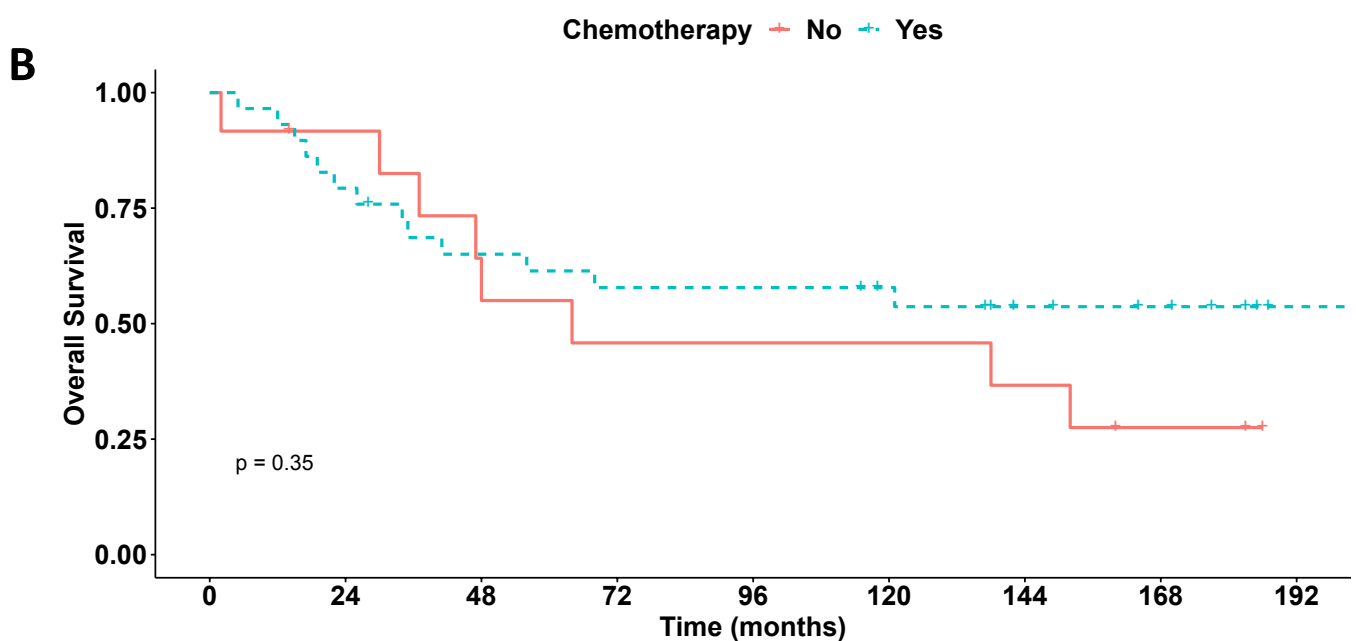

Chemotherapy

|     | Number at risk: n (%) |         |         |         |         |         |        |        |       |
|-----|-----------------------|---------|---------|---------|---------|---------|--------|--------|-------|
|     | 0                     | 24      | 48      | 72      | 96      | 120     | 144    | 168    | 192   |
| No  | 12 (100)              | 10 (83) | 7 (58)  | 5 (42)  | 5 (42)  | 5 (42)  | 4 (33) | 2 (17) | 0 (0) |
| Yes | 29 (100)              | 23 (79) | 18 (62) | 16 (55) | 16 (55) | 14 (48) | 9 (31) | 7 (24) | 1 (3) |

Time (months)

**Supplementary Material S4:** Comparison of EFS (A) and OS (B) for patients with incomplete surgical resection treated with chemotherapy (per protocol) and without on the SIOP Ependymoma I study.
