# Supplementary material for: SIOP Ependymoma I: Final results, long-term follow-up, and molecular analysis of the trial cohort—A BIOMECA Consortium Study
Source: PubMed Central journal article supplement — Neuro Oncol. 2022 Jan 9;24(6):936–48. doi: 10.1093/neuonc/noac012 (PMC9159435; doi:10.1093/neuonc/noac012), 2022-01-09
Supplement: noac012_suppl_supplementary_material_s6.pdf [file noac012_suppl_supplementary_material_s6.pdf]

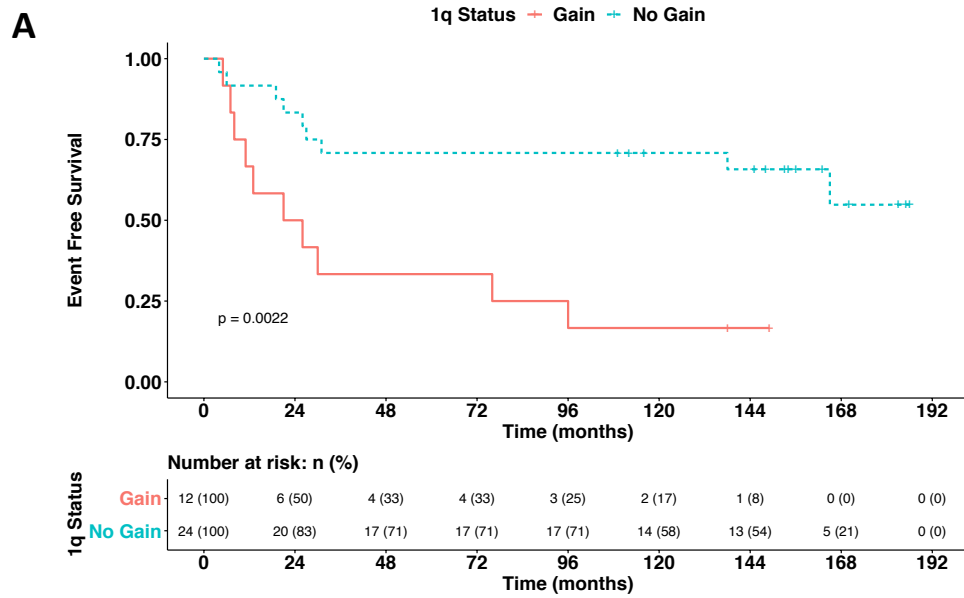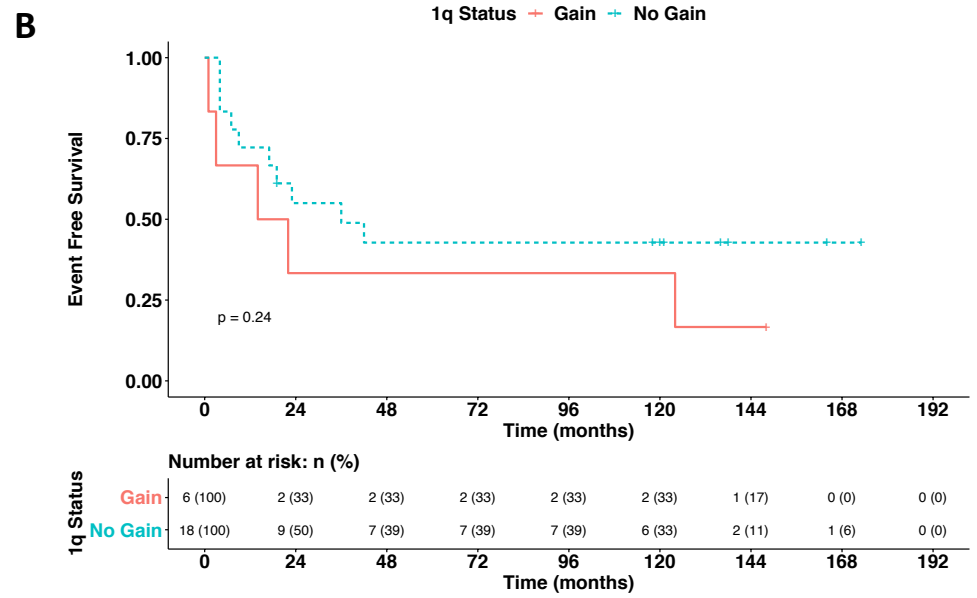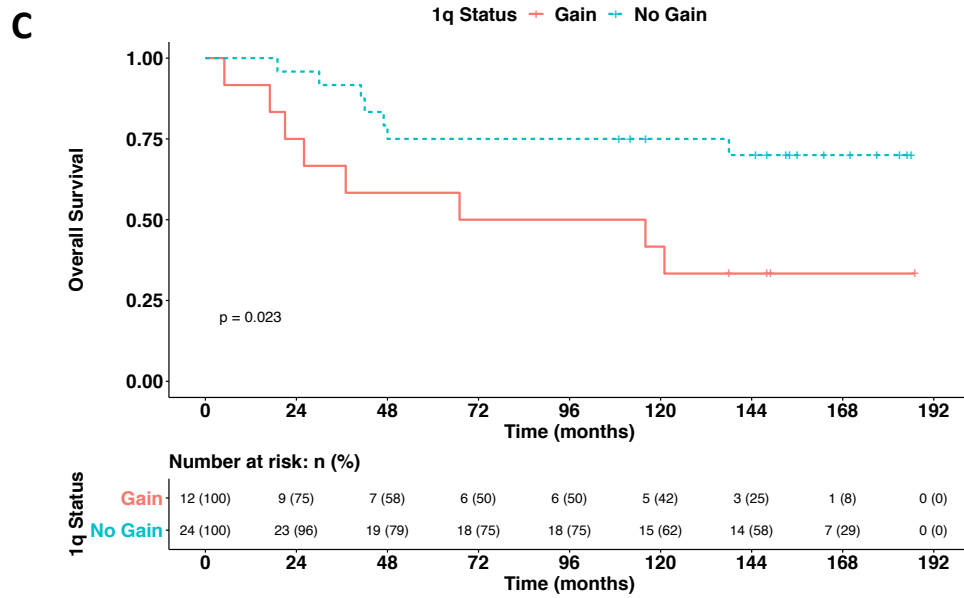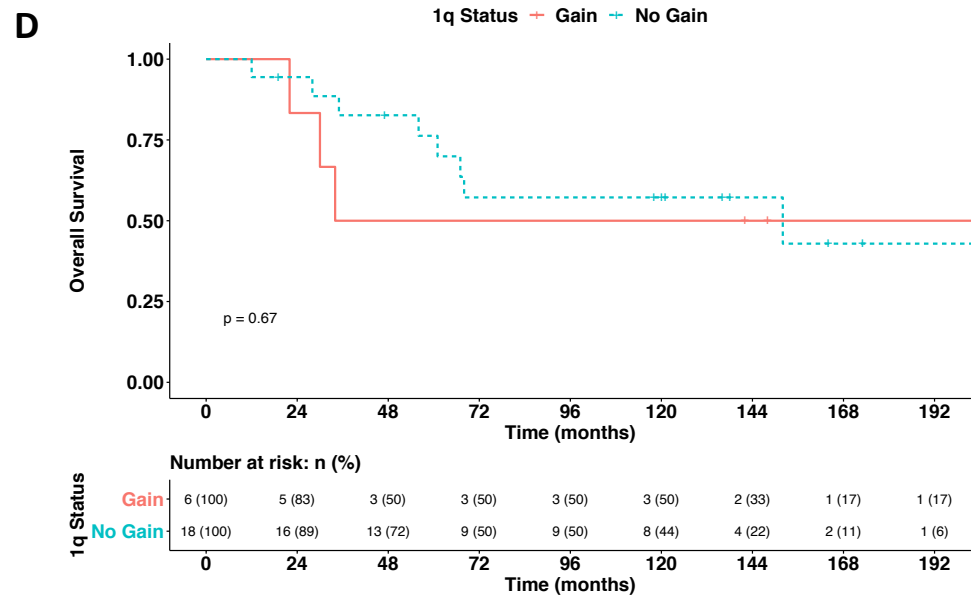

**Supplementary Material S6:** Association between 1q gain and (A) EFS in posterior fossa tumours, (B) EFS in supratentorial tumours, (C) OS in posterior fossa tumours and (D) OS in supratentorial tumours. Note that the association between outcome and 1q gain is only seen in the posterior fossa cohorts for both survival metrics.
